# Supplementary material
Source: PubMed Central journal article supplement (PMC7455804)

T1

T2

T3

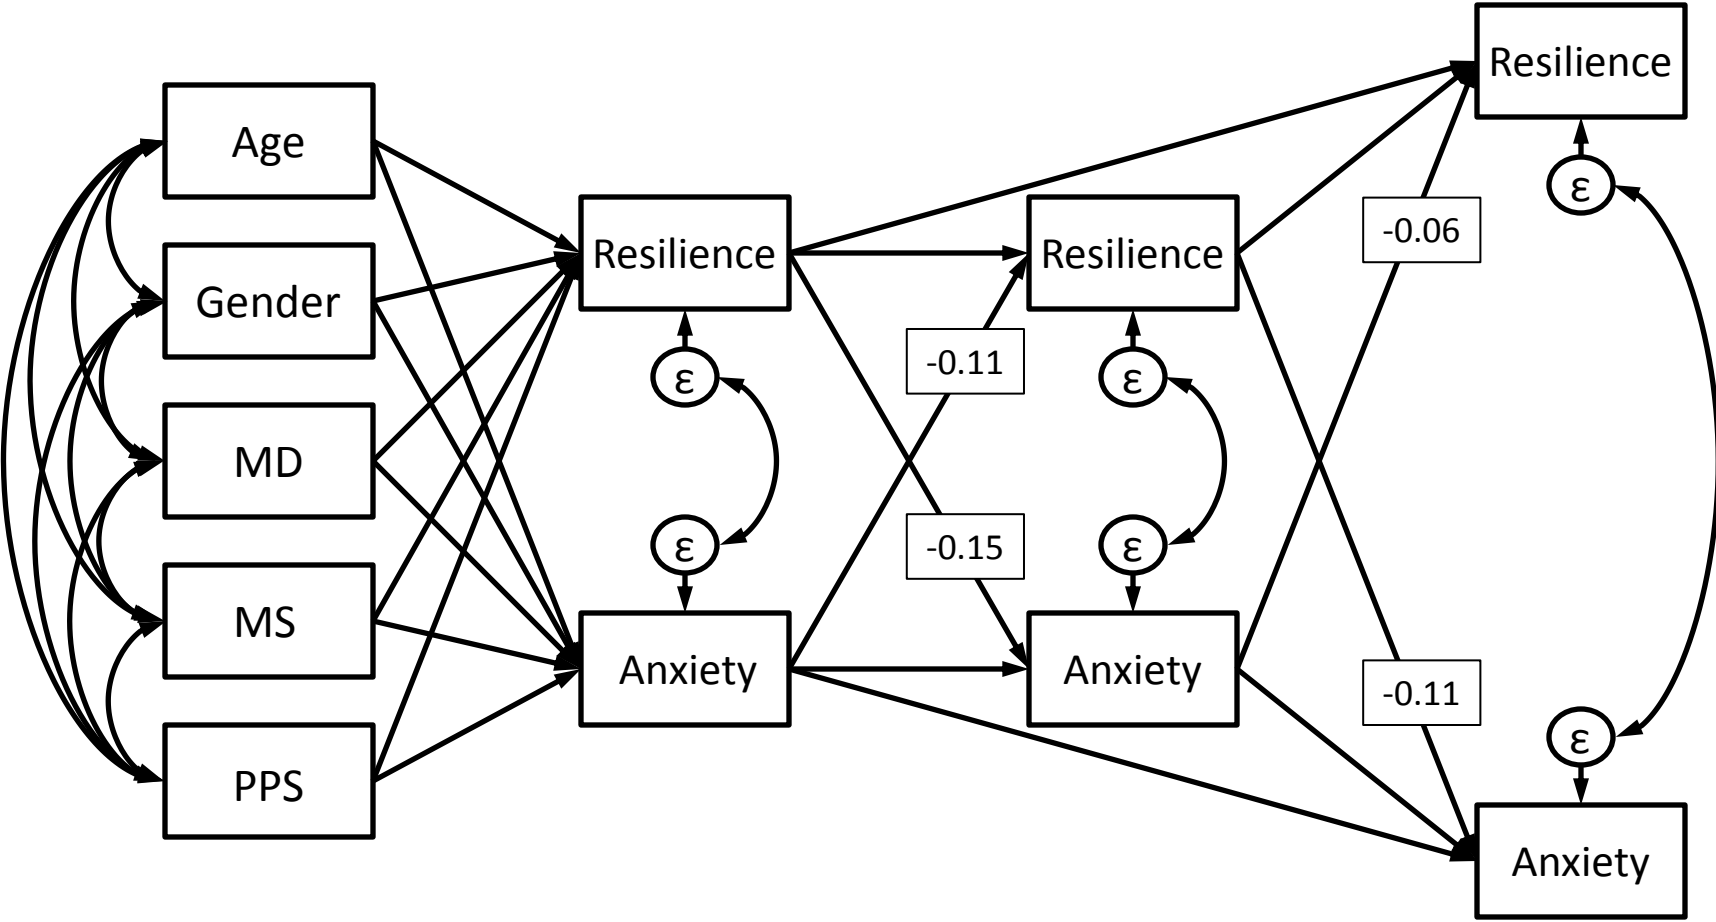

Supplement: kaz048_suppl_supplemental_figure1.pdf [file kaz048_suppl_supplemental_figure1.pdf]

T1

T2

T3

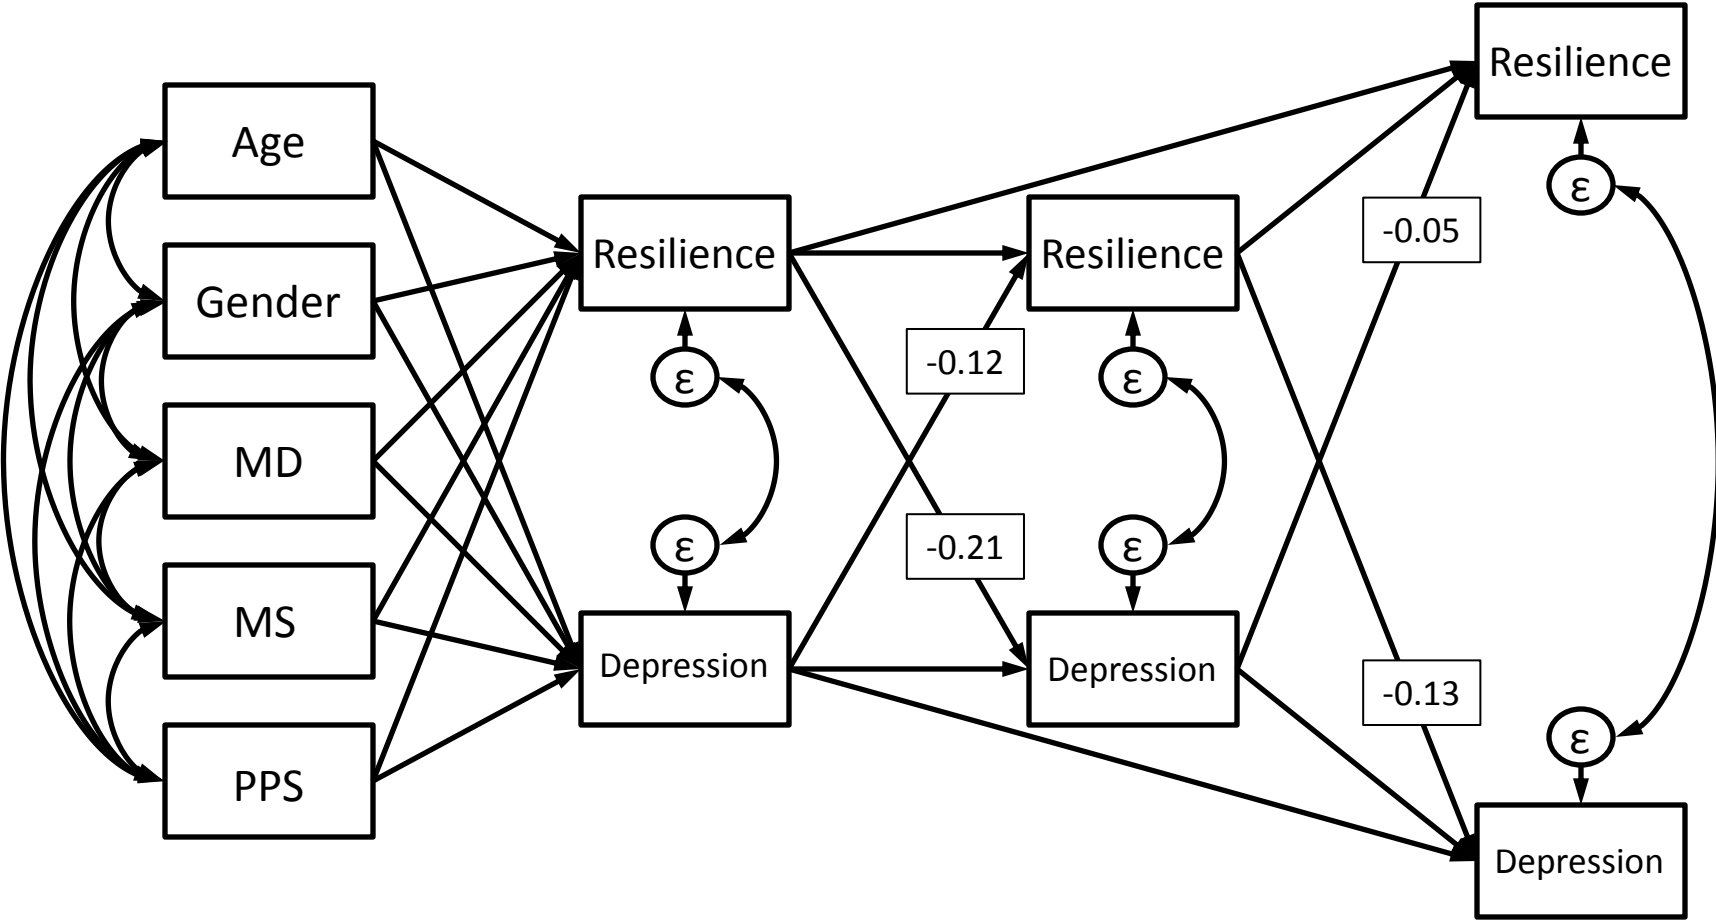

Supplement: kaz048_suppl_supplemental_figure2.pdf [file kaz048_suppl_supplemental_figure2.pdf]

T1

T2

T3

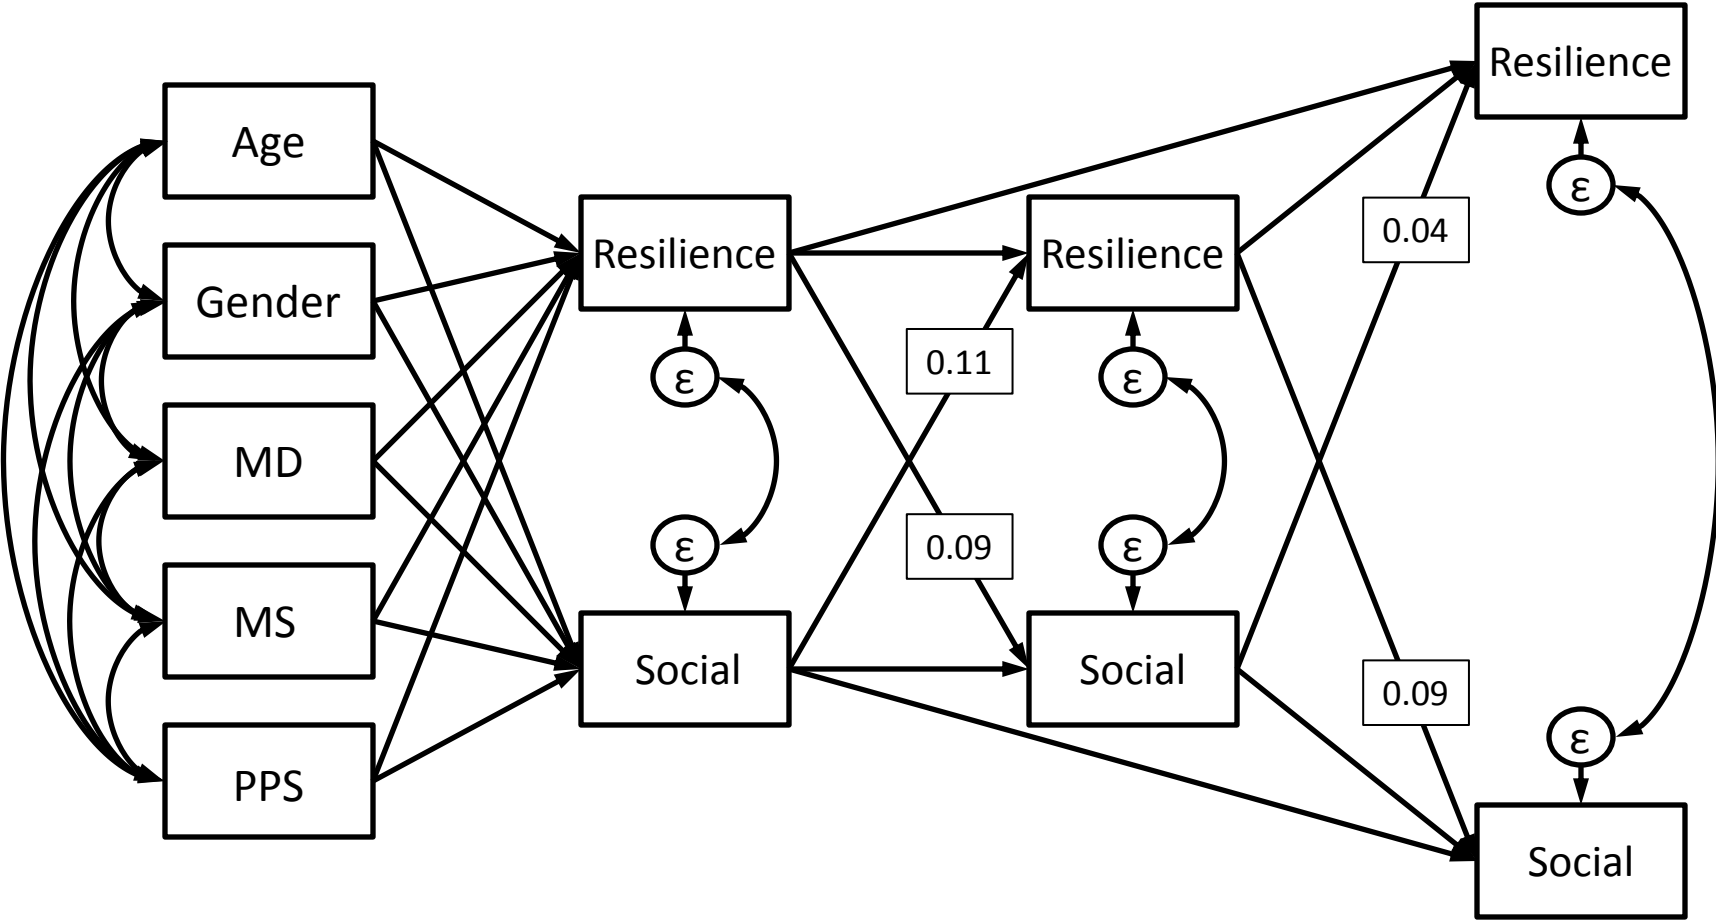

Supplement: kaz048_suppl_supplemental_figure3.pdf [file kaz048_suppl_supplemental_figure3.pdf]
